# Supplementary material for: Co-inhibition of mTORC1, HDAC and ESR1α retards the growth of triple-negative breast cancer and suppresses cancer stem cells
Source: PubMed Central journal article supplement (PMC6062597; doi:10.1038/s41419-018-0811-7), 2018-07-26
Supplement: 41419_2018_811_MOESM1_ESM.pdf [file 41419_2018_811_MOESM1_ESM.pdf]

# Supplemental Figure 1

A

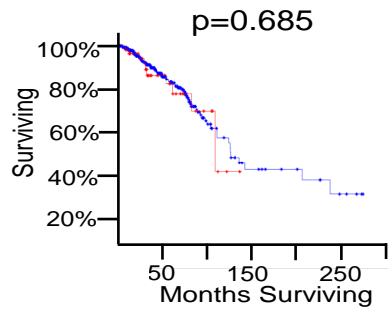

|                        | HDAC Expression |       |
|------------------------|-----------------|-------|
|                        | High            | Low   |
| Total Cases            | 72              | 454   |
| Deceased               | 11              | 72    |
| Median Months Survival | 112.2           | 129.6 |

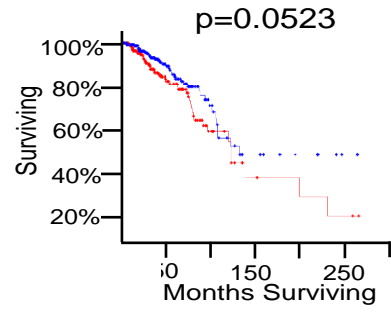

|                        | mTORC1 Expression |       |
|------------------------|-------------------|-------|
|                        | High              | Low   |
| Total Cases            | 246               | 281   |
| Deceased               | 45                | 38    |
| Median Months Survival | 129.4             | 140.1 |

# Supplemental Figure 2

A

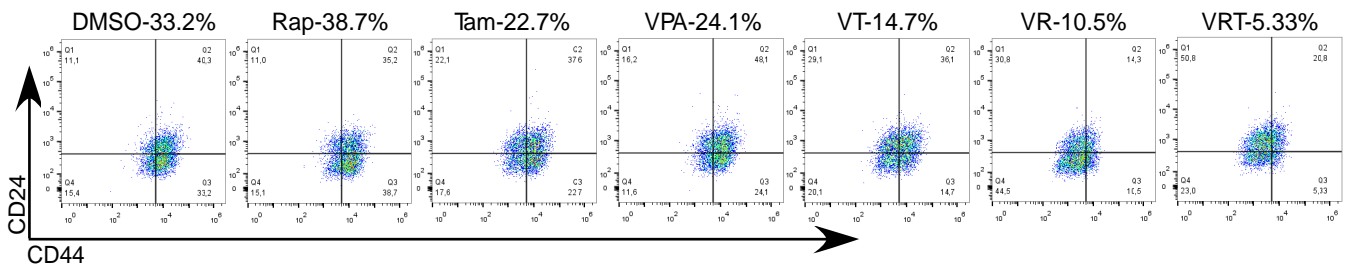

B

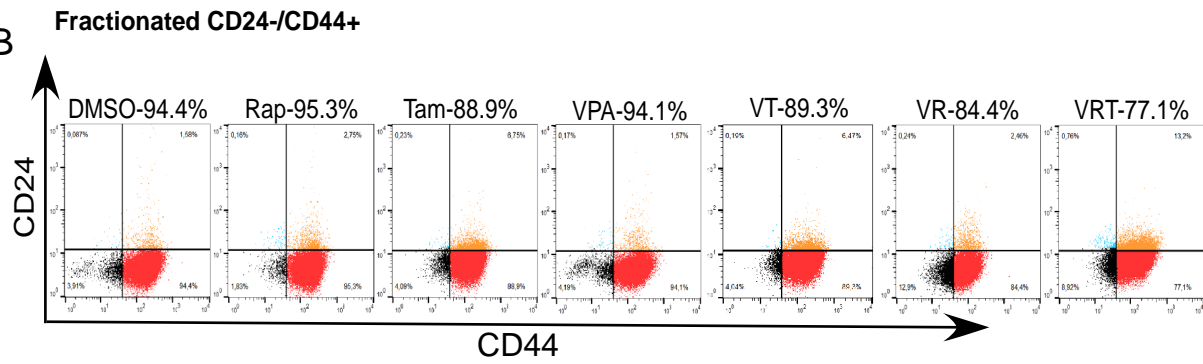

# Supplemental Figure 3

A

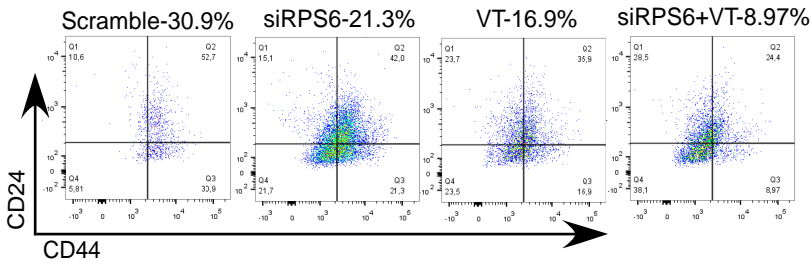

B

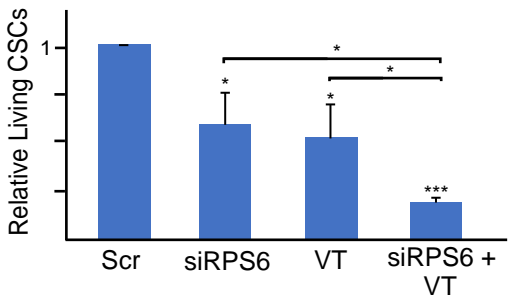

# Supplemental Figure 4

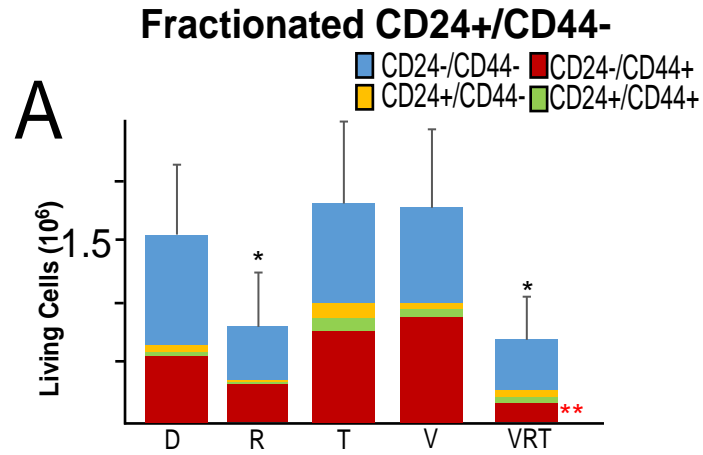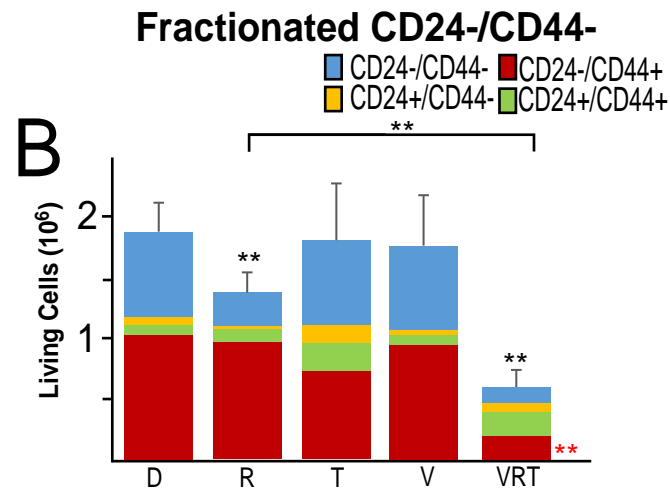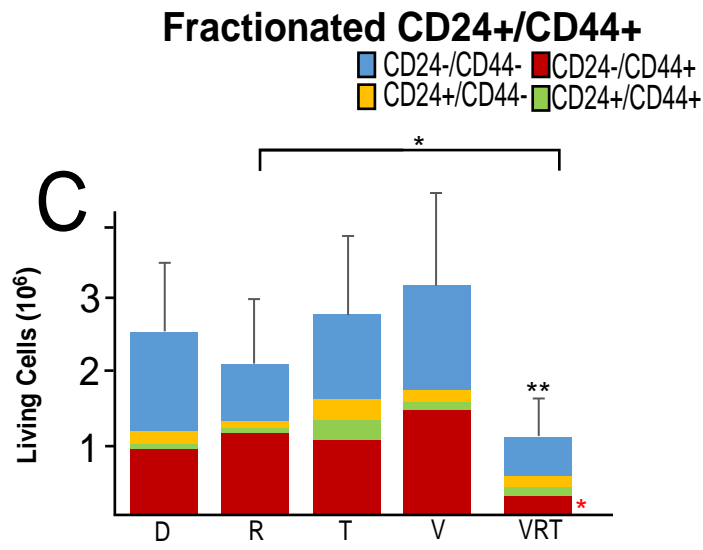

# Supplemental Figure 5

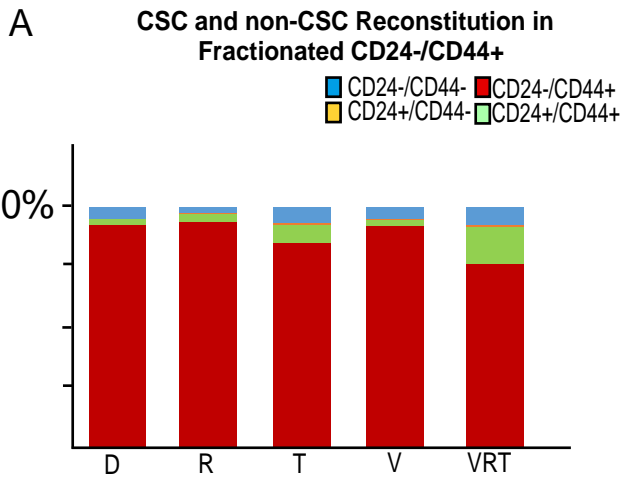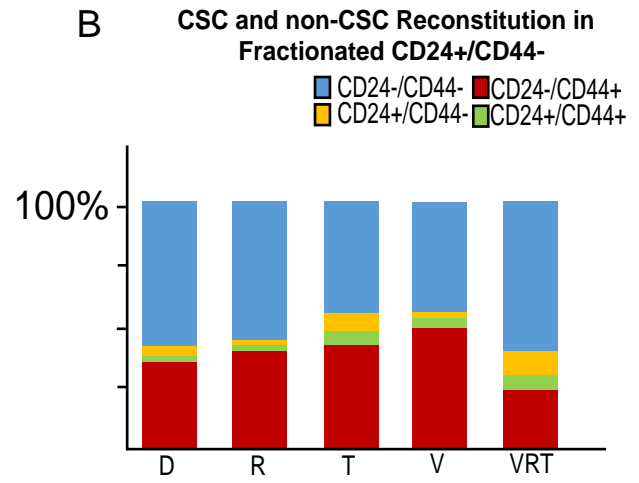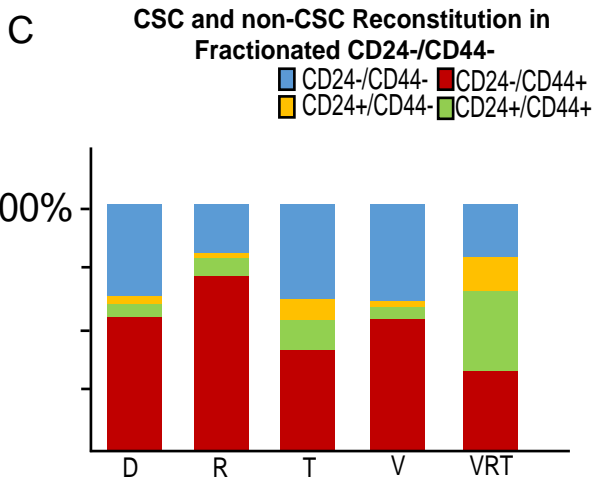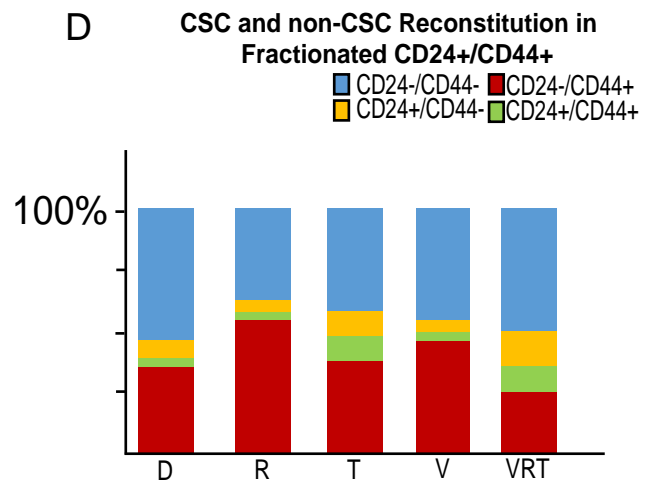

# Supplemental Figure 6

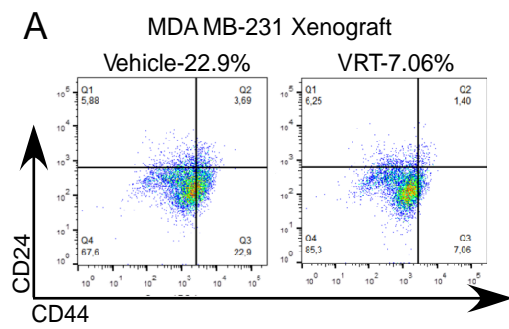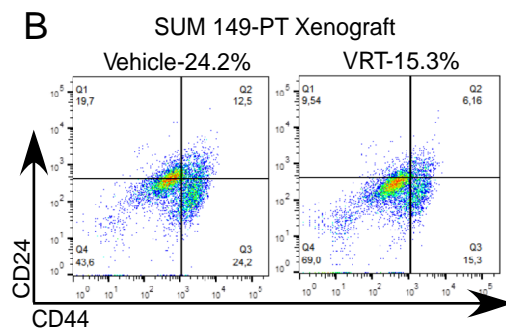

# Supplemental Figure 7

A

## SUM 149-PT

|         | $1 \times 10^5$ | $1 \times 10^4$ | $1 \times 10^3$ | $1 \times 10^2$ |
|---------|-----------------|-----------------|-----------------|-----------------|
| Vehicle | 3/3             | 2/3             | 1/3             | 0/3             |
| VRT     | 2/3             | 0/3             | 0/3             | 0/3             |

Table S1. Primers used in RT-qPCR

| <b>Genes</b>    | <b>Forward</b>            | <b>Reverse</b>            |
|-----------------|---------------------------|---------------------------|
| <b>18S</b>      | AACCCGTTGAACCCCAT         | CCATCCAATCGGTAGTAGCG      |
| <b>HDAC1</b>    | ACCGGGCAACGTTACGAAT       | CTATCAAAGGACACGCCAAGTG    |
| <b>HDAC2</b>    | TCATTGGAAAATTGACAGCATAGT  | CATGGTGATGGTGTTGAAGAAG    |
| <b>HDAC3</b>    | TTGAGTTCTGCTCGCGTTACA     | CCCAGTTAATGGCAATATCACAGAT |
| <b>HDAC5</b>    | TTGGAGACGTGGAGTACCTTACAG  | GACTAGGACCACATCAGGTGAGAAC |
| <b>HDAC6</b>    | TGGCTATTGCATGTTCAACCA     | GTCGAAGGTGAACTGTGTTCCCT   |
| <b>HDAC7</b>    | CTGCATTGGAGGAATGAAGCT     | CTGGCACAGCGGATGTTTTG      |
| <b>HDAC8</b>    | TCCCGAGTATGTCAGTATATATGA  | GCTTCAATCAAAGAATGCACCAT   |
| <b>RPS6KB1</b>  | CACATAACCTGTGGTCTGTTGCTG  | AGATGCAAAGCGAACTTGGGATA   |
| <b>RPS6KB2</b>  | CTTCCAGACTGGTGGCAAACCTCTA | CAGCGTGATCTCAGCCAGGTA     |
| <b>EIF4EBP1</b> | CCCGCTTATCTTCTGGGCTA      | CTATGACCGGAAATTCCTGATGG   |
| <b>CD44</b>     | AGACAACCACAAGGATGACTGATG  | TCCAGTTTCCTTCATAAGCAGTGG  |
| <b>GAPDH</b>    | ACAGTCAGCCGCATCTTCTT      | GACAAGCTTCCCGTTCTCAG      |
| <b>ESR1</b>     | GGAGACATGAGAGCTGCCAAC     | CCAGCAGCATGTCGAAGATC      |
